# Supplementary material for: Extending the structural landscape of Mo(vi) hydrazonato inorganic–organic POM-hybrids: an experimental and computational study
Source: Royal Society of Chemistry journal article supplement (doi:10.1039/d1ce00861g), 2021-01-01
Supplement: d1ce00861g1.pdf [file d1ce00861g1.pdf]

Additional supplementary material

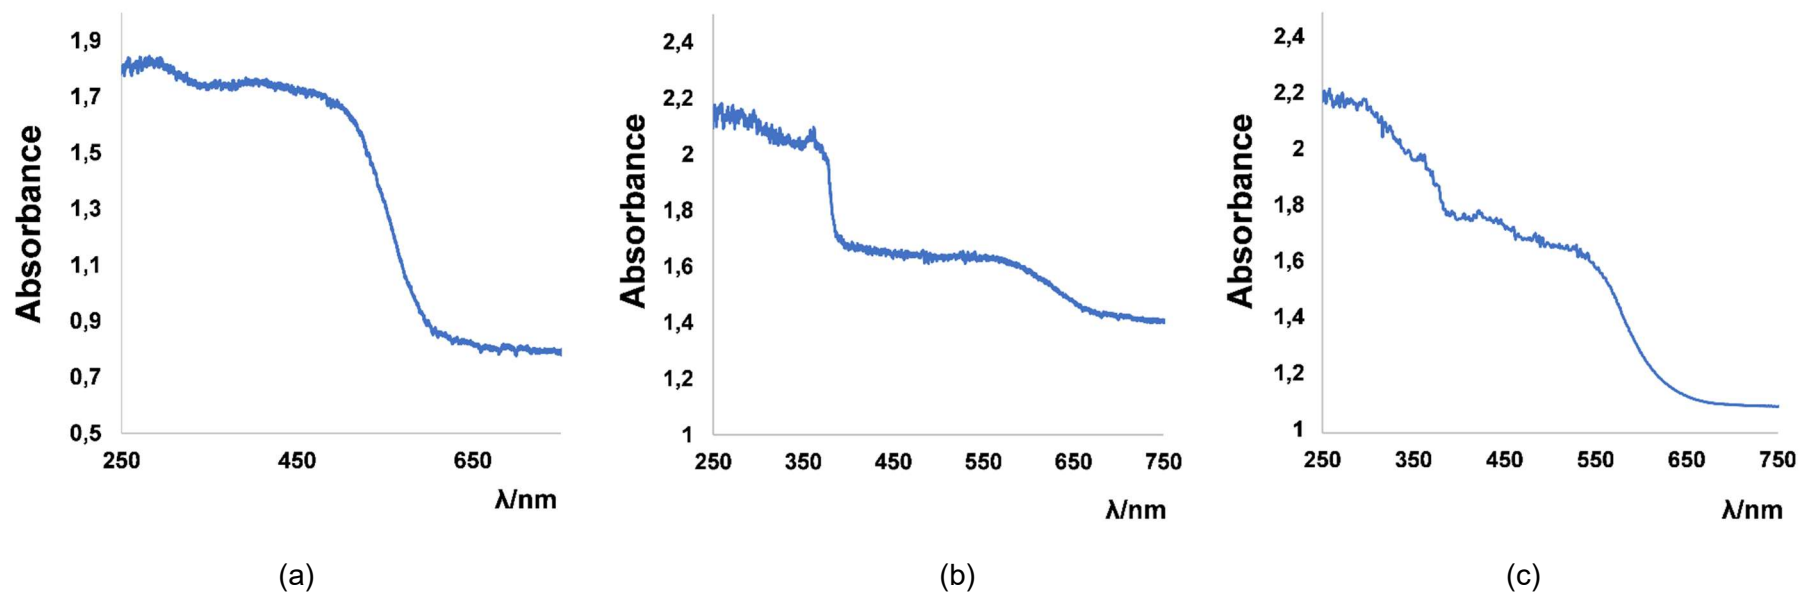

Figure 1. a) Solid state UV-Vis spectra of (a) **2**, (b) **2<sup>Hm</sup>**, and (c) **2<sup>ow</sup>** recorded on a Thermo Scientific Evolution 350 UV-Visible Spectrophotometer.
